# Supplementary material
Source: PubMed Central journal article supplement (PMC10238648)

Full unprocessed blot shown in Extended Data Figures 1F & 5H

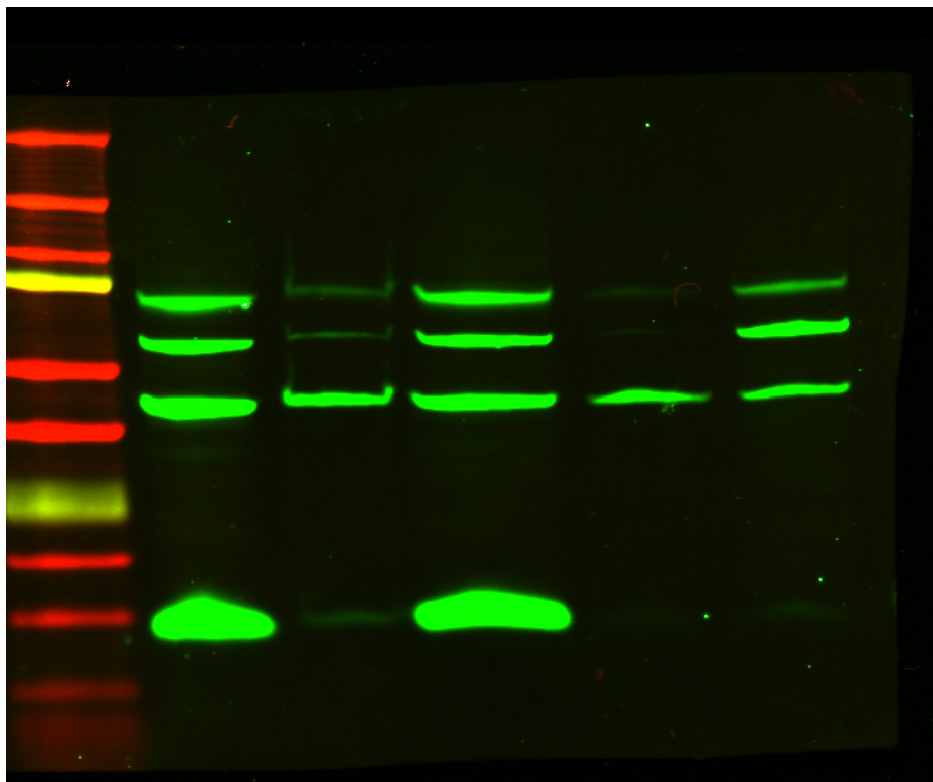

Supplement: NIHMS1865181-supplement-1865181_SD_ED1F___5H.pdf [file NIHMS1865181-supplement-1865181_SD_ED1F___5H.pdf]

Extended Data Figure 5F full unprocessed blot

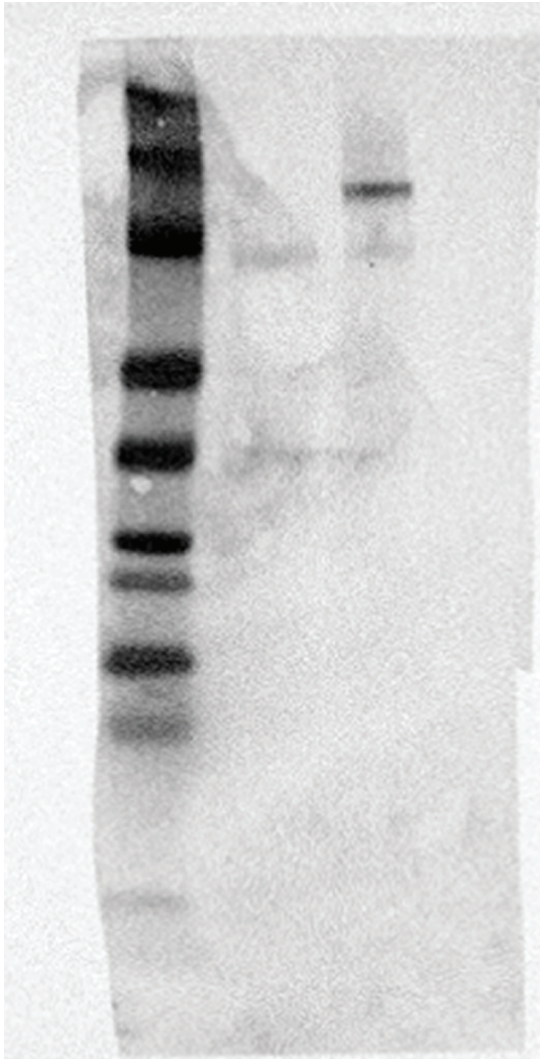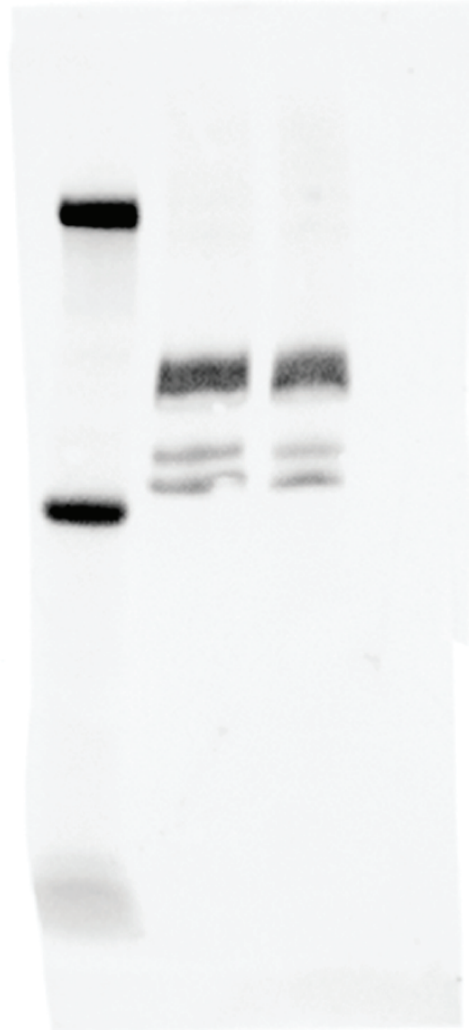

Supplement: NIHMS1865181-supplement-1865181_SD_ED5F.pdf [file NIHMS1865181-supplement-1865181_SD_ED5F.pdf]
